# Supplementary material for: In vitro evidence of oncofetal antigen and TLR-9 agonist co-delivery by alginate nanovaccines for liver cancer immunotherapy
Source: Royal Society of Chemistry journal article supplement (doi:10.1039/d1bm02021h), 2022-01-01
Supplement: d1bm02021h1.pdf [file d1bm02021h1.pdf]

Electronic Supplementary Information

**In vitro evidence of oncofetal antigen and TLR-  
9 agonist co-delivery by alginate nanovaccine  
for liver cancer immunotherapy**

Mengyue Pei <sup>a, #</sup>, Huiyang Li <sup>a, #</sup>, Yingwei Zhu <sup>b, c \*</sup>, Jian Lu <sup>c</sup>, Chuangnian Zhang <sup>a, d \*</sup>

<sup>a</sup> *Tianjin Key Laboratory of Biomaterial Research, Biomedical Barriers Research Center, Institute of Biomedical Engineering, Chinese Academy of Medical Science & Peking Union Medical College, Tianjin, 300192, China*

<sup>b</sup> *Department of Gastroenterology, The Affiliated Wuxi No.2 People's Hospital of Nanjing Medical University, Wuxi city, 214002, China*

<sup>c</sup> *Department of Gastroenterology, Wuxi No.2 People's Hospital, Affiliated Wuxi Clinical College of Nantong University, Wuxi city, 214002, China*

<sup>d</sup> *State Key Laboratory of Medicinal Chemical Biology, Nankai University, Tianjin, 300353, China*

# Mengyue Pei and Huiyang Li contributed equally to this work.

**\* Corresponding authors**

Dr. Yingwei Zhu, [zhuyingw2020@163.com](mailto:zhuyingw2020@163.com);

Dr. Chuangnian Zhang, [cnzhang@mail.nankai.edu.cn](mailto:cnzhang@mail.nankai.edu.cn);

## Supplemental figures

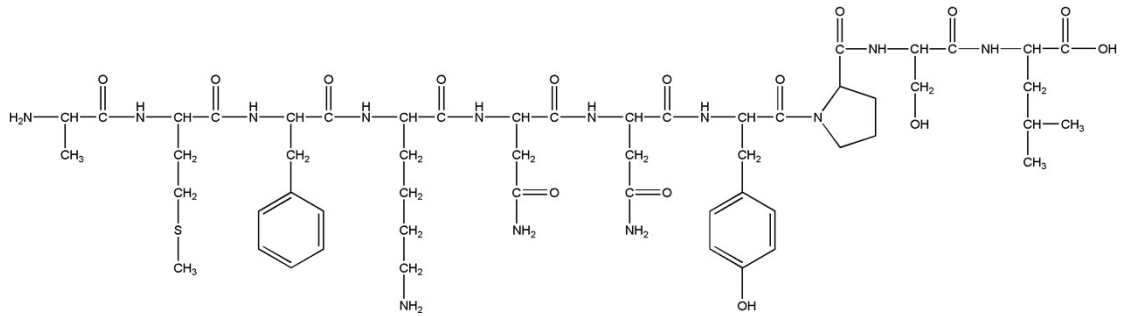

Figure S1. The chemical structure of GPC-3<sub>127-136</sub> peptide (AMFKNNYPSL).

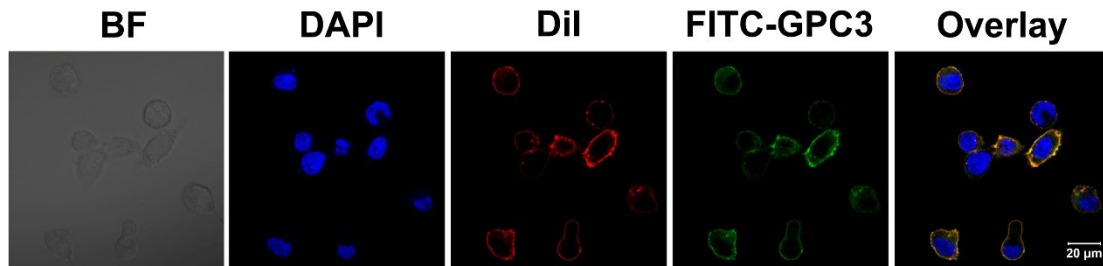

Figure S2. CLSM image of Hepa1-6 cells.

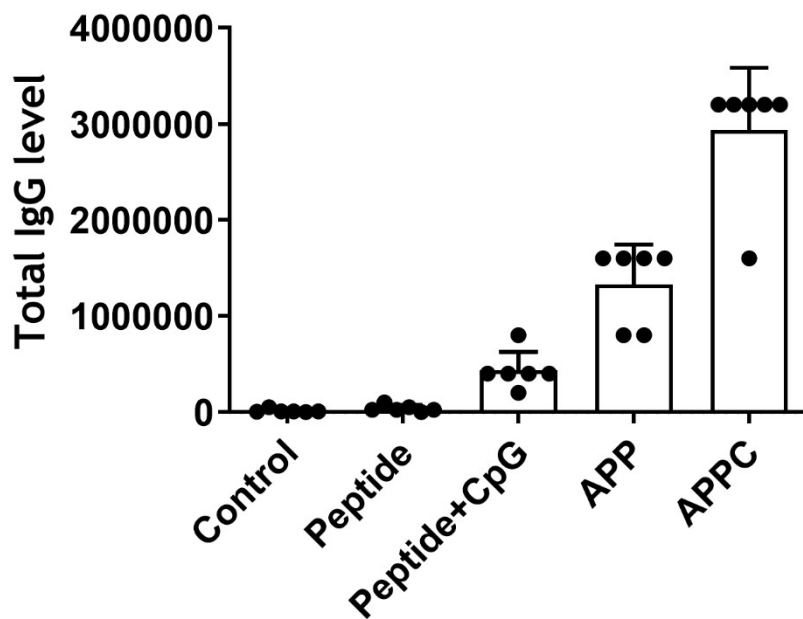

Figure S3. The total IgG level in mice serum.

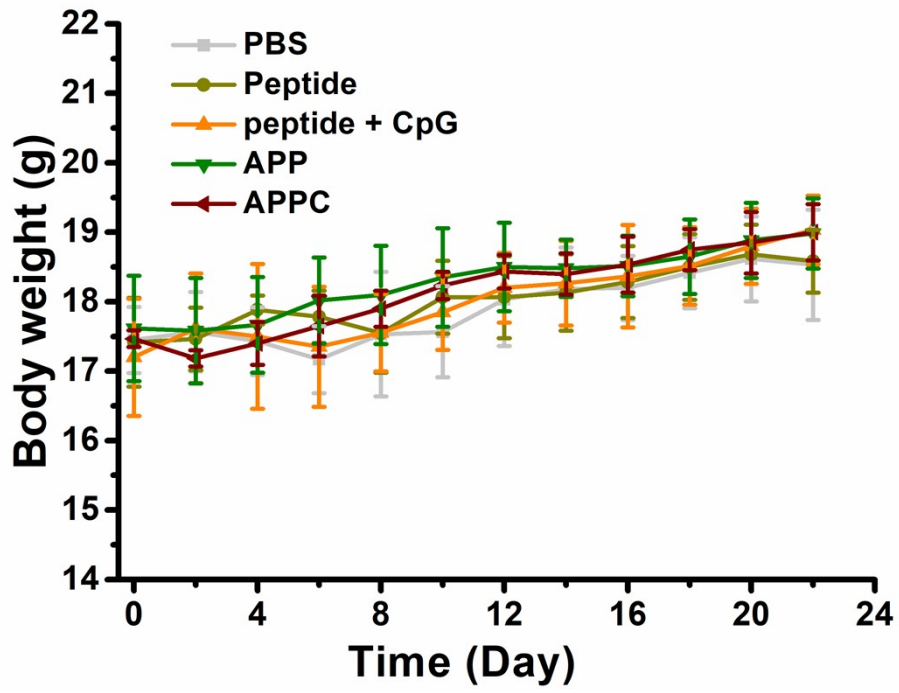

Figure S4. The body weight during the total immunization course.
